# Supplementary material
Source: MDPI journal article supplement (https://www.mdpi.com/2313-433X/7/12/256)
Supplement: s1 [file s1]

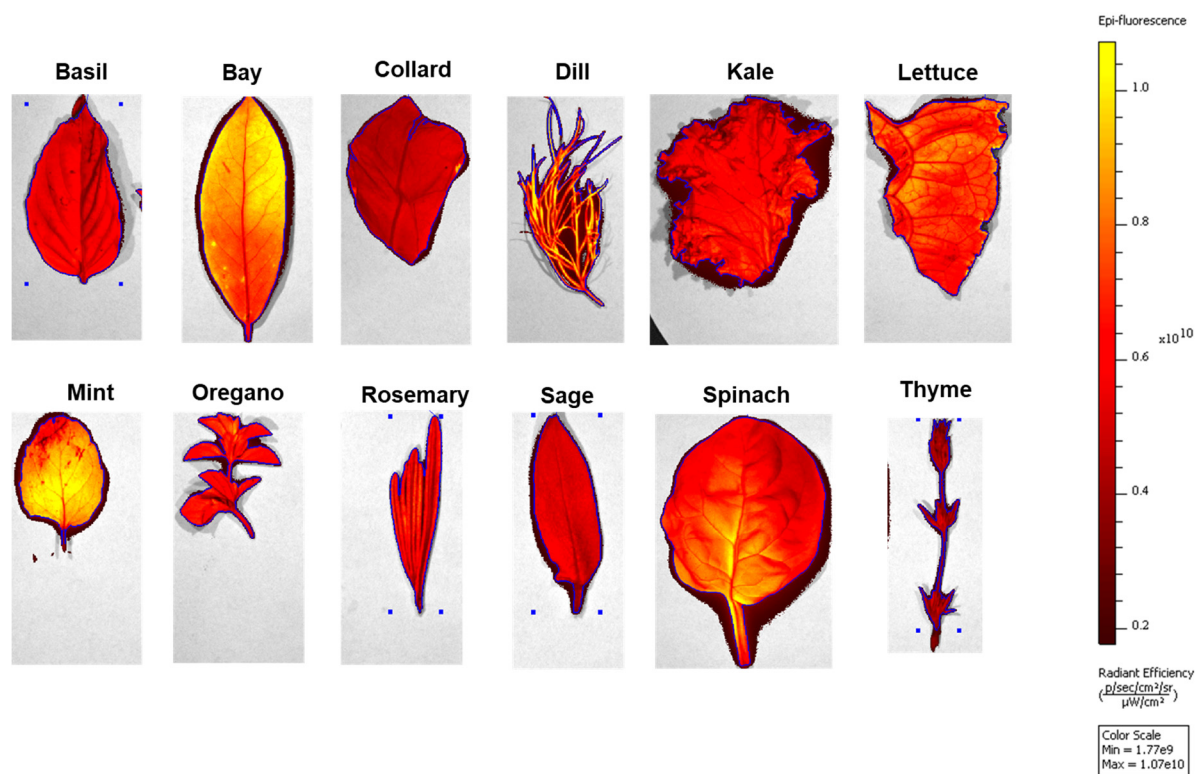

**Figure S1.** Twelve different dietary whole leaves were imaged using the IVIS Imaging System for chlorophyll content.
